# Supplementary material for: Incidence, Risk Factors, and Outcomes of Kidney Transplant Recipients Treated With Both Basiliximab and Antithymocyte Globulin
Source: PubMed Central journal article supplement — Can J Kidney Health Dis. 2020 Oct 15;7:2054358120964061. doi: 10.1177/2054358120964061 (PMC7573718; doi:10.1177/2054358120964061), 2020-10-15

## **Supplementary Material**

**Figure S1.** Cohort creation.

**Table S1.** STROBE checklist.

**Table S2.** Age, sex, and delayed graft function-adjusted associations of recipient and transplant characteristics with dual induction therapy compared to basiliximab alone.

**Table S3.** P values of log rank test for the difference of Kaplan-Meier failure functions for 2 by 2 comparisons.

**Figure S2.** Cumulative incidence functions (unadjusted competing risk models) by type of induction therapy used for A) Death-censored graft failure (graft failure with competing event of death with a functioning graft) and B) Death with a functioning graft (death with competing event of graft failure before death).

**Figure S1.** Cohort creation.

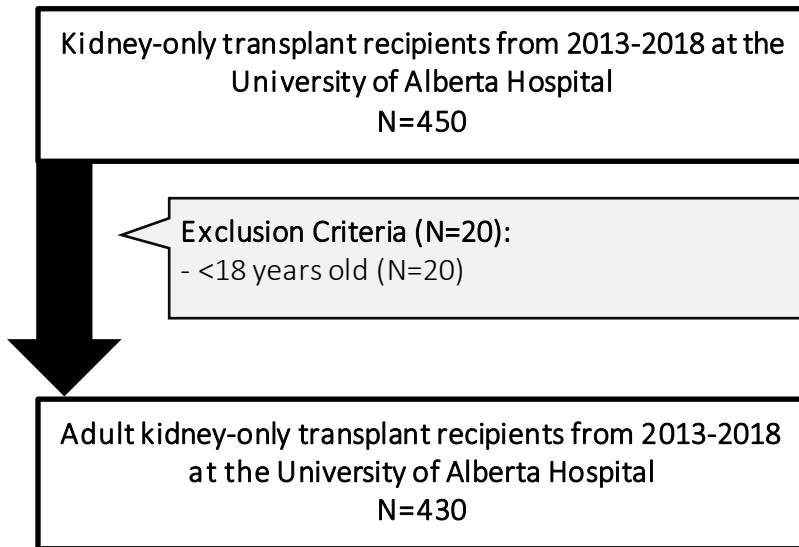

| Table S1. STROBE checklist <sup>8</sup> |      |                                                                                                                                                                                      |                      |
|-----------------------------------------|------|--------------------------------------------------------------------------------------------------------------------------------------------------------------------------------------|----------------------|
|                                         | Item | Recommendation                                                                                                                                                                       | Section              |
| Title and abstract                      | 1    | (a) Indicate the study's design with a commonly used term in the title or the abstract                                                                                               | Title Page           |
|                                         |      | (b) Provide in the abstract an informative and balanced summary of what was done and what was found                                                                                  | Abstract             |
| <b>Introduction</b>                     |      |                                                                                                                                                                                      |                      |
| Background/rationale                    | 2    | Explain the scientific background and rationale for the investigation being reported                                                                                                 | Introduction         |
| Objectives                              | 3    | State specific objectives, including any prespecified hypotheses                                                                                                                     | Introduction         |
| <b>Methods</b>                          |      |                                                                                                                                                                                      |                      |
| Study design                            | 4    | Present key elements of study design early in the paper                                                                                                                              | Methods              |
| Setting                                 | 5    | Describe the setting, locations, and relevant dates, including periods of recruitment, exposure, follow-up, and data collection                                                      | Methods              |
| Participants                            | 6    | (a) Give the eligibility criteria, and the sources and methods of selection of participants. Describe methods of follow-up                                                           | Methods              |
|                                         |      | (b) For matched studies, give matching criteria and number of exposed and unexposed                                                                                                  | Not applicable       |
| Variables                               | 7    | Clearly define all outcomes, exposures, predictors, potential confounders, and effect modifiers. Give diagnostic criteria, if applicable                                             | Methods              |
| Data sources/<br>measurement            | 8    | For each variable of interest, give sources of data and details of methods of assessment (measurement). Describe comparability of assessment methods if there is more than one group | Methods              |
| Bias                                    | 9    | Describe any efforts to address potential sources of bias                                                                                                                            | Methods              |
| Study size                              | 10   | Explain how the study size was arrived at                                                                                                                                            | Methods<br>Figure S1 |
| Quantitative variables                  | 11   | Explain how quantitative variables were handled in the analyses. If applicable, describe which groupings were chosen and why                                                         | Methods              |
| Statistical methods                     | 12   | (a) Describe all statistical methods, including those used to control for confounding                                                                                                | Methods              |
|                                         |      | (b) Describe any methods used to examine subgroups and interactions                                                                                                                  | Methods              |
|                                         |      | (c) Explain how missing data were addressed                                                                                                                                          | Methods              |
|                                         |      | (d) If applicable, explain how loss to follow-up was addressed                                                                                                                       | Methods              |
|                                         |      | (e) Describe any sensitivity analyses                                                                                                                                                | Methods              |

| Table S1. STROBE checklist (continued). |      |                                                                                                                                                                                                               |                                   |
|-----------------------------------------|------|---------------------------------------------------------------------------------------------------------------------------------------------------------------------------------------------------------------|-----------------------------------|
|                                         | Item | Recommendation                                                                                                                                                                                                | Section                           |
| <b>Results</b>                          |      |                                                                                                                                                                                                               |                                   |
| Participants                            | 13   | (a) Report numbers of individuals at each stage of study—e.g. numbers potentially eligible, examined for eligibility, confirmed eligible, included in the study, completing follow-up, and analysed           | Figure S1                         |
|                                         |      | (b) Give reasons for non-participation at each stage                                                                                                                                                          | Figure S1                         |
|                                         |      | (c) Consider use of a flow diagram                                                                                                                                                                            | Figure S1                         |
| Descriptive data                        | 14   | (a) Give characteristics of study participants (e.g. demographic, clinical, social) and information on exposures and potential confounders                                                                    | Results<br>Table 1                |
|                                         |      | (b) Indicate number of participants with missing data for each variable of interest                                                                                                                           | Table 1                           |
|                                         |      | (c) Summarise follow-up time (e.g. average and total amount)                                                                                                                                                  | Results                           |
| Outcome data                            | 15   | Report numbers of outcome events or summary measures over time                                                                                                                                                | Results<br>Table 3<br>Figure 1    |
| Main results                            | 16   | (a) Give unadjusted estimates and, if applicable, confounder-adjusted estimates and their precision (e.g. 95% confidence interval). Make clear which confounders were adjusted for and why they were included | Results<br>Table 1-3              |
|                                         |      | (b) Report category boundaries when continuous variables were categorized                                                                                                                                     | Table 1-3                         |
|                                         |      | (c) If relevant, consider translating estimates of relative risk into absolute risk for a meaningful time period                                                                                              | Table 1-3<br>Figure 1             |
| Other analyses                          | 17   | Report other analyses done—e.g. analyses of subgroups and interactions, and sensitivity analyses                                                                                                              | Table S2<br>Table S3<br>Figure S2 |
| <b>Discussion</b>                       |      |                                                                                                                                                                                                               |                                   |
| Key results                             | 18   | Summarise key results with reference to study objectives                                                                                                                                                      | Discussion                        |
| Limitations                             | 19   | Discuss limitations of the study, taking into account sources of potential bias or imprecision. Discuss both direction and magnitude of any potential bias                                                    | Discussion                        |
| Interpretation                          | 20   | Give a cautious overall interpretation of results considering objectives, limitations, multiplicity of analyses, results from similar studies, and other relevant evidence                                    | Discussion                        |
| Generalisability                        | 21   | Discuss the generalisability (external validity) of the study results                                                                                                                                         | Discussion                        |
| <b>Other information</b>                |      |                                                                                                                                                                                                               |                                   |
| Funding                                 | 22   | Give the source of funding and the role of the funders for the present study and, if applicable, for the original study on which the present article is based                                                 | Funding                           |

| <b>Table S2. Age, sex, and delayed graft function-adjusted associations of recipient and transplant characteristics with dual induction therapy compared to basiliximab alone.</b> |                            |
|------------------------------------------------------------------------------------------------------------------------------------------------------------------------------------|----------------------------|
| <b>Characteristic</b>                                                                                                                                                              | <b>Odds ratio (95% CI)</b> |
| <b>Recipients Factors</b>                                                                                                                                                          |                            |
| <b>Age (years)</b>                                                                                                                                                                 | 0.99 (0.96, 1.02)          |
| >65 years                                                                                                                                                                          | 0.71 (0.18, 2.76)          |
| <b>Female sex</b>                                                                                                                                                                  | 1.06 (0.36, 3.14)          |
| <b>Race</b>                                                                                                                                                                        |                            |
| Caucasian                                                                                                                                                                          | Reference                  |
| Black                                                                                                                                                                              | 1.01 (0.15, 6.68)          |
| Asian                                                                                                                                                                              | N/A                        |
| Other <sup>a</sup>                                                                                                                                                                 | 0.76 (0.24, 2.43)          |
| Missing                                                                                                                                                                            | N/A                        |
| <b>BMI (kg/m<sup>2</sup>)</b>                                                                                                                                                      | 1.04 (0.95, 1.13)          |
| Underweight (<18.5)                                                                                                                                                                | Reference                  |
| Normal (18.5-24.9)                                                                                                                                                                 | 0.95 (0.21, 4.44)          |
| Overweight (25.0-29.9)                                                                                                                                                             | 0.48 (0.07, 3.33)          |
| Obese (≥30)                                                                                                                                                                        | 1.48 (0.23, 9.41)          |
| Missing                                                                                                                                                                            | N/A                        |
| <b>Primary cause of ESRD</b>                                                                                                                                                       |                            |
| Glomerulonephritis                                                                                                                                                                 | 0.18 (0.05, 0.63)*         |
| Diabetes mellitus                                                                                                                                                                  | Reference                  |
| Polycystic kidney disease                                                                                                                                                          | 0.67 (0.14, 3.15)          |
| Hypertension                                                                                                                                                                       | 2.25 (0.21, 24.66)         |
| Other                                                                                                                                                                              | 0.34 (0.10, 1.09)          |
| Missing                                                                                                                                                                            | 1.22 (0.27, 5.56)          |
| <b>Pretransplant dialysis modality</b>                                                                                                                                             |                            |
| Hemodialysis                                                                                                                                                                       | Reference                  |
| Peritoneal dialysis                                                                                                                                                                | 0.71 (0.24, 2.11)          |
| Pre-emptive                                                                                                                                                                        | 0.80 (0.09, 6.76)          |
| Missing                                                                                                                                                                            | 4.19 (0.41, 43.09)         |
| <b>Dialysis duration (years)</b>                                                                                                                                                   | 1.12 (0.89, 1.41)          |
| <b>ABO blood group</b>                                                                                                                                                             |                            |
| A                                                                                                                                                                                  | Reference                  |
| B                                                                                                                                                                                  | 0.48 (0.09, 2.52)          |
| O                                                                                                                                                                                  | 0.88 (0.34, 2.27)          |
| AB                                                                                                                                                                                 | 0.49 (0.06, 3.65)          |
| <b>cPRA (%)</b>                                                                                                                                                                    | 1.01 (1.00, 1.03)          |
| 0                                                                                                                                                                                  | Reference                  |
| 1-9                                                                                                                                                                                | 1.87 (0.60, 5.80)          |
| 10-79                                                                                                                                                                              | 1.08 (0.38, 3.05)          |
| ≥80                                                                                                                                                                                | 5.90 (1.44, 24.10)*        |
| Missing                                                                                                                                                                            | 2.51 (0.26, 24.65)         |

| <b>Table S2. Age, sex, and delayed graft function-adjusted associations of recipient and transplant characteristics with dual induction therapy compared to basiliximab alone.</b> |                                 |
|------------------------------------------------------------------------------------------------------------------------------------------------------------------------------------|---------------------------------|
| <b>Characteristic</b>                                                                                                                                                              | <b>Odds ratio (95% CI)</b>      |
| <b>Co-morbidities</b>                                                                                                                                                              |                                 |
| Previous organ transplant                                                                                                                                                          | 0.93 (0.11, 7.66)               |
| Hypertension                                                                                                                                                                       | 0.79 (0.19, 3.25)               |
| Diabetes mellitus                                                                                                                                                                  | 1.52 (0.58, 3.99)               |
| Myocardial infarction                                                                                                                                                              | 0.79 (0.20, 3.11)               |
| Cerebrovascular accident                                                                                                                                                           | 0.66 (0.08, 5.55)               |
| Peripheral vascular disease                                                                                                                                                        | 5.14 (0.99, 26.69)              |
| COPD                                                                                                                                                                               | 0.56 (0.09, 3.35)               |
| Malignancy                                                                                                                                                                         | 1.52 (0.46, 4.96)               |
| <b>Maintenance Immunosuppression<sup>b</sup></b>                                                                                                                                   |                                 |
| Tac + MPA/MMF/AZA + Pred                                                                                                                                                           | Reference                       |
| Tac + MPA/MMF/AZA                                                                                                                                                                  | 1.54 (0.37, 6.31)               |
| Tac or Tac + Pred                                                                                                                                                                  | N/A                             |
| Other                                                                                                                                                                              | N/A                             |
| Missing                                                                                                                                                                            | N/A                             |
| <b>Transplant Factors</b>                                                                                                                                                          |                                 |
| <b>Transplant era</b>                                                                                                                                                              |                                 |
| 2013 – 2015                                                                                                                                                                        | Reference                       |
| 2016 – 2018                                                                                                                                                                        | 0.17 (0.06, 0.49) <sup>†</sup>  |
| <b>Donor type</b>                                                                                                                                                                  |                                 |
| Neurological Determination of Death                                                                                                                                                | Reference                       |
| Donation After Cardiac Death                                                                                                                                                       | 2.69 (0.58, 12.40)              |
| Live Donor                                                                                                                                                                         | 2.61 (0.39, 17.69)              |
| <b>HLA mismatches</b>                                                                                                                                                              |                                 |
| Zero A, B, DR, DQ                                                                                                                                                                  | N/A                             |
| Zero DR                                                                                                                                                                            | 0.92 (0.29, 2.87)               |
| Zero DQ                                                                                                                                                                            | 0.85 (0.25, 2.85)               |
| <b>DSA</b>                                                                                                                                                                         |                                 |
| None                                                                                                                                                                               | Reference                       |
| Class I only                                                                                                                                                                       | N/A                             |
| Class II only                                                                                                                                                                      | N/A                             |
| Class I and II                                                                                                                                                                     | N/A                             |
| Missing                                                                                                                                                                            | 6.97 (2.27, 21.42) <sup>†</sup> |

| <b>Table S2. Age, sex, and delayed graft function-adjusted associations of recipient and transplant characteristics with dual induction therapy compared to basiliximab alone.</b>                                                                                                                                                                                                                                           |                            |
|------------------------------------------------------------------------------------------------------------------------------------------------------------------------------------------------------------------------------------------------------------------------------------------------------------------------------------------------------------------------------------------------------------------------------|----------------------------|
| <b>Characteristic</b>                                                                                                                                                                                                                                                                                                                                                                                                        | <b>Odds ratio (95% CI)</b> |
| <b>CMV status</b>                                                                                                                                                                                                                                                                                                                                                                                                            |                            |
| Donor (-)/Recipient (-)                                                                                                                                                                                                                                                                                                                                                                                                      | Reference                  |
| Donor (+)/Recipient (-)                                                                                                                                                                                                                                                                                                                                                                                                      | 1.71 (0.40, 7.37)          |
| Donor (-/+)/Recipient (+)                                                                                                                                                                                                                                                                                                                                                                                                    | 0.66 (0.18, 2.49)          |
| <b>EBV status</b>                                                                                                                                                                                                                                                                                                                                                                                                            |                            |
| Donor (-)/Recipient (-)                                                                                                                                                                                                                                                                                                                                                                                                      | N/A                        |
| Donor (+)/Recipient (-)                                                                                                                                                                                                                                                                                                                                                                                                      | N/A                        |
| Donor (-/+)/Recipient (+)                                                                                                                                                                                                                                                                                                                                                                                                    | N/A                        |
| <b>Cold ischemia time, hours</b>                                                                                                                                                                                                                                                                                                                                                                                             |                            |
| 0-12                                                                                                                                                                                                                                                                                                                                                                                                                         | Reference                  |
| 13-24                                                                                                                                                                                                                                                                                                                                                                                                                        | 1.17 (0.48, 2.84)          |
| >24                                                                                                                                                                                                                                                                                                                                                                                                                          | 10.30 (0.97, 109.83)       |
| Missing                                                                                                                                                                                                                                                                                                                                                                                                                      | N/A                        |
| <b>Delayed graft function<sup>c</sup></b>                                                                                                                                                                                                                                                                                                                                                                                    | 37.16 (14.39, 95.97)‡      |
| N/A: Unable to estimate odds ratio due to 0 values in the cells.                                                                                                                                                                                                                                                                                                                                                             |                            |
| <sup>a</sup> Included Aboriginal, Asian Indian, Filipino, Inuit, Latin American, Metis, Middle Eastern/Arabian, Other/Multiracial, and Pacific Islander.                                                                                                                                                                                                                                                                     |                            |
| <sup>b</sup> Maintenance immunosuppression is defined as any of those drugs with an initiation date within 7 days of the transplant.                                                                                                                                                                                                                                                                                         |                            |
| <sup>c</sup> Defined as receipt of dialysis within the first week of transplant.                                                                                                                                                                                                                                                                                                                                             |                            |
| Abbreviations: AZA, azathioprine; BMI, body mass index; CI, confidence interval; CMV, cytomegalovirus; COPD, chronic obstructive pulmonary disease; cPRA, calculated panel reactive antibody; DSA, donor specific antibody; EBV, Epstein-Barr virus; ESRD, end-stage renal disease; HLA, human leukocyte antigen; MMF, mycophenolate mofetil; MPA, mycophenolic acid; N/A, not available; Pred, prednisone; Tac, tacrolimus. |                            |
| P-values (reference to basiliximab alone): *P<0.05–0.002; †P=0.001–0.0001; ‡P<0.0001.                                                                                                                                                                                                                                                                                                                                        |                            |

**Table S3. P values of log rank test for the difference of Kaplan-Meier failure functions for 2 by 2 comparisons.**

| <b>Outcomes</b>                | <b>Basiliximab Alone vs. ATG Alone</b> | <b>Dual vs. Basiliximab Alone</b> | <b>Dual vs. ATG Alone.</b> |
|--------------------------------|----------------------------------------|-----------------------------------|----------------------------|
| All-cause graft failure        | 0.08                                   | 0.0001                            | 0.03                       |
| Death-censored graft failure   | 0.2                                    | 0.0001                            | 0.03                       |
| All-cause death                | 0.09                                   | 0.005                             | 0.2                        |
| Death with a functioning graft | 0.2                                    | 0.04                              | 0.3                        |

Abbreviation: ATG, anti-thymocyte globulin.



**Figure S2.** Cumulative incidence functions (unadjusted competing risk models) by type of induction therapy used for A) Death-censored graft failure (graft failure with competing event of death with a functioning graft) and B) Death with a functioning graft (death with competing event of graft failure before death).

A) Death-censored graft failure

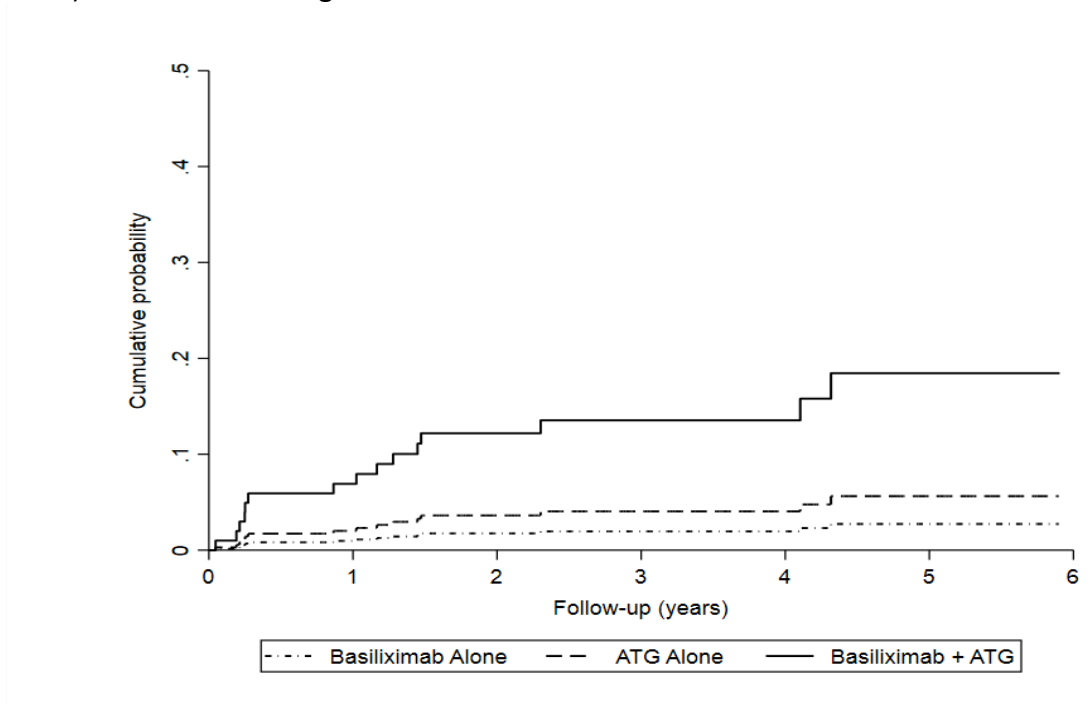

B) Death with a functioning graft

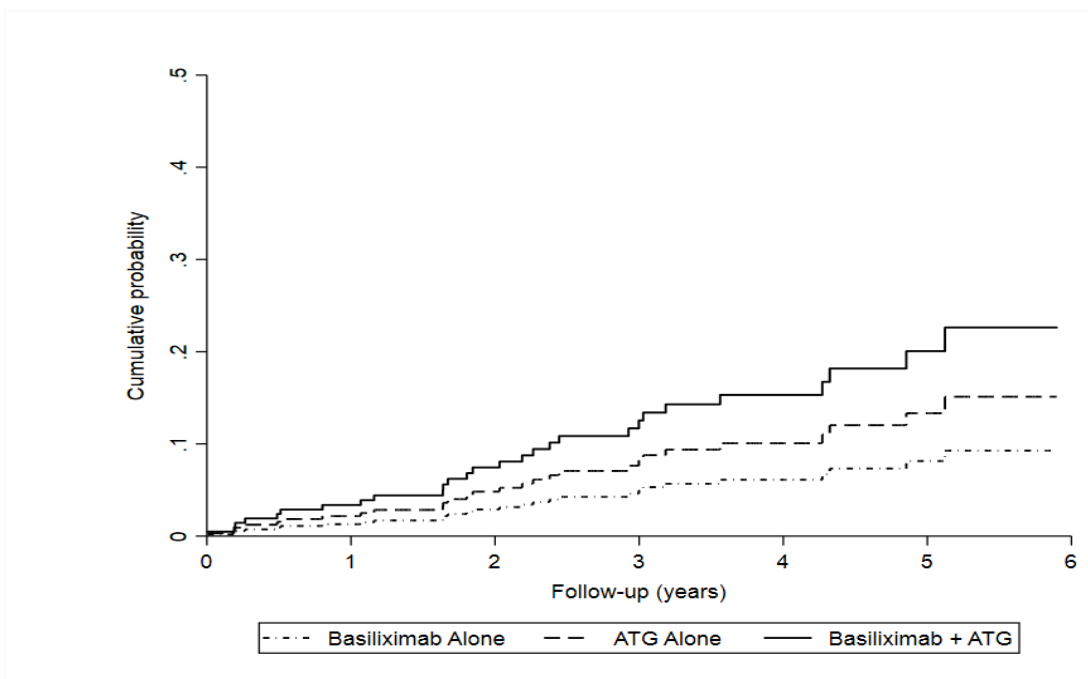

Supplement: RTx_Dual_Induction_-_Supplementary_Material_-_20200807.pdf [file RTx_Dual_Induction_-_Supplementary_Material_-_20200807.pdf]
